# Supplementary material for: Particulate matter causes skin barrier dysfunction
Source: JCI journal article supplement (doi:10.1172/jci.insight.145185), 2021-01-26
Supplement: sd1 [file 1]

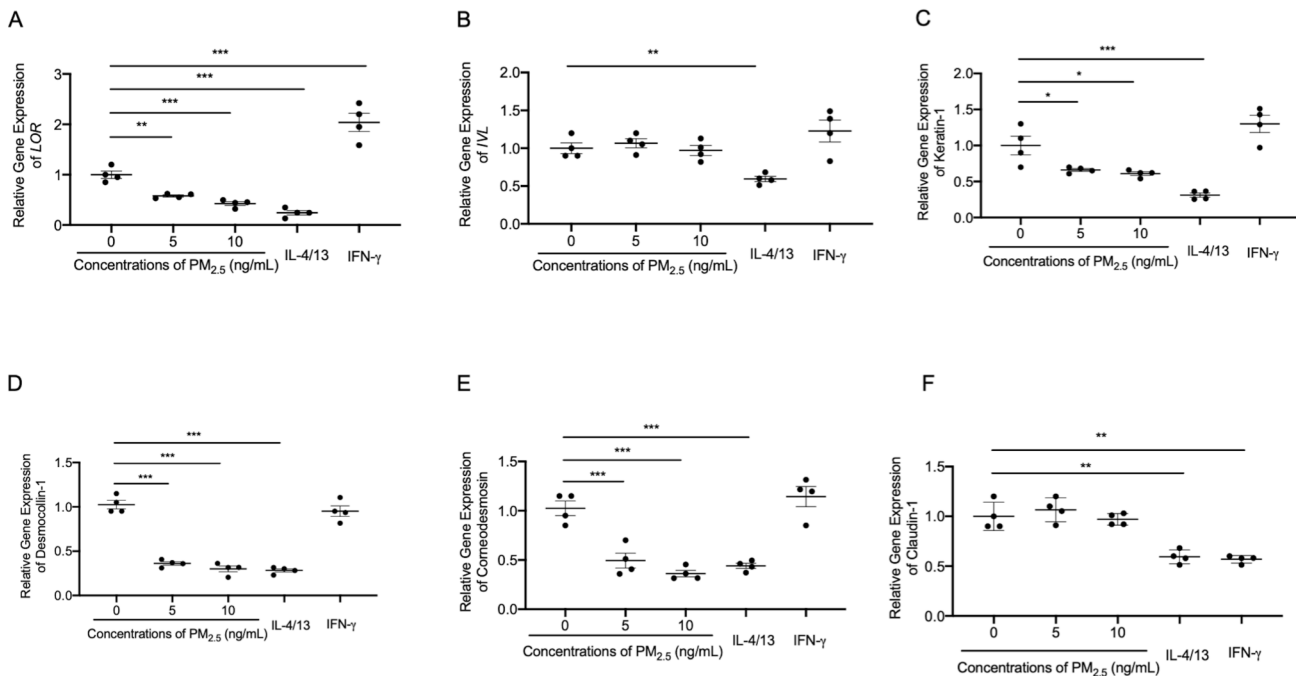

**Supplementary Figure 1. PM<sub>2.5</sub> modulates the epidermal barrier proteins in human primary keratinocytes.**

HEKs were differentiated for 3 days and then the cells were stimulated with various concentrations of PM<sub>2.5</sub>, Th2 cytokines (IL-4 and IL-13), or IFN-γ for an additional 48 h. Gene expressions of *LOR* (A), *IVL* (B), keratin-1 (C), desmocollin-1 (D), corneodesmosin (E), and claudin-1 (F) were evaluated using real-time RT-PCR. Data are representative of three independent experimental repetitions. The data are shown as the mean ± SEM. n = 3 per group. \**P*<0.05, \*\**P*<0.01, \*\*\**P*<0.001 by one-way ANOVA with Tukey-Kramer post-hoc test.

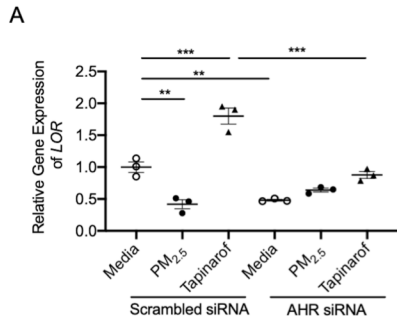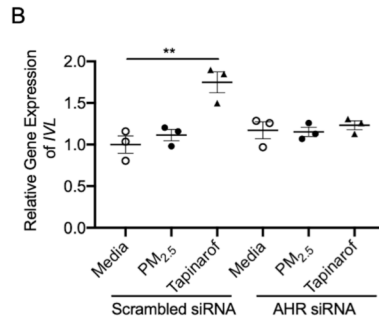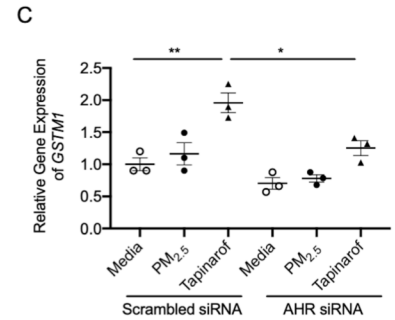

**Supplementary Figure 2. PM<sub>2.5</sub> and tapinarof modulate gene expressions of epidermal barrier proteins and *GSTM1* in human primary keratinocytes.**

Gene expressions of *LOR* (A), *IVL* (B), and *GSTM1* (C) were examined in cultured HEKs using real-time RT-PCR. n = 3 per group. Data are representative of three independent experimental repetitions. The data are shown as the mean ± SEM. \**P*<0.05, \*\**p*<0.01, \*\*\**p*<0.001 by one-way ANOVA with Tukey-Kramer post-hoc test.

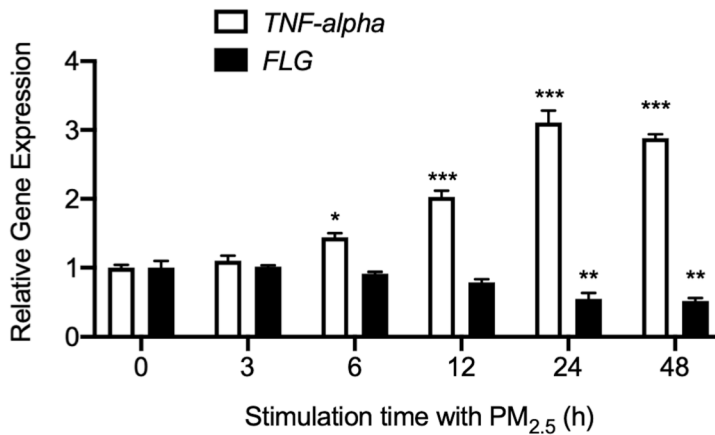

**Supplementary Figure 3.  $PM_{2.5}$  induces expression of *TNF-alpha* and inhibits *FLG* subsequently in human primary keratinocytes.**

HEKs were differentiated for 3 days and then the cells were stimulated with  $PM_{2.5}$  for various periods up to 48 h. Gene expressions of *TNF-alpha* and *FLG* were evaluated using real-time RT-PCR. Data are representative of three independent experimental repetitions.

The data are shown as the mean  $\pm$  SEM. n = 3 per group. \* $P$ <0.05, \*\* $P$ <0.01, \*\*\* $P$ <0.001 by repeated measures ANOVA with Tukey-Kramer post-hoc test.
